# Supplementary material for: Hijacking of multiple phospholipid biosynthetic pathways and induction of membrane biogenesis by a picornaviral 3CD protein
Source: PubMed Central journal article supplement (PMC5983871; doi:10.1371/journal.ppat.1007086), 2018-05-21
Supplement: ppat.1007086.s001.pdf [file ppat.1007086.s001.pdf]

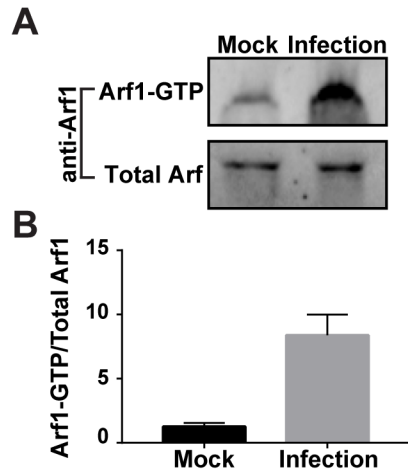

S1 Fig. **Poliovirus infection causes activation of Arf1.** **(A)** HeLa cells were infected with WT PV at an MOI of 10. A lysate was prepared 4 h post-infection and used for an GST-GGA3-pull-down assay as outlined in **Fig. 3A**, with subsequent Western blotting and detection using anti-Arf1 antibody. Arf1-GTP (bead-eluted material) and total Arf1 (from unfractionated lysate) were detected by Western blot using the indicated antibodies and enhanced chemifluorescence. **(B)** The magnitude of Arf1 activation was determined by quantifying the fluorescence intensity of Arf1-GTP and total Arf1 and reporting the quotient thereof. The averages of the values for the quotients (n=4) were:  $1.27 \pm 0.14$  (SEM) in mock-infected cells and  $8.37 \pm 0.03$  (SEM) in WT PV-infected cells. The difference was significant based on a Student's t-test, which gave a P value of 0.0001.
