# Supplementary material for: Hijacking of multiple phospholipid biosynthetic pathways and induction of membrane biogenesis by a picornaviral 3CD protein
Source: PubMed Central journal article supplement (PMC5983871; doi:10.1371/journal.ppat.1007086), 2018-05-21
Supplement: ppat.1007086.s002.pdf [file ppat.1007086.s002.pdf]

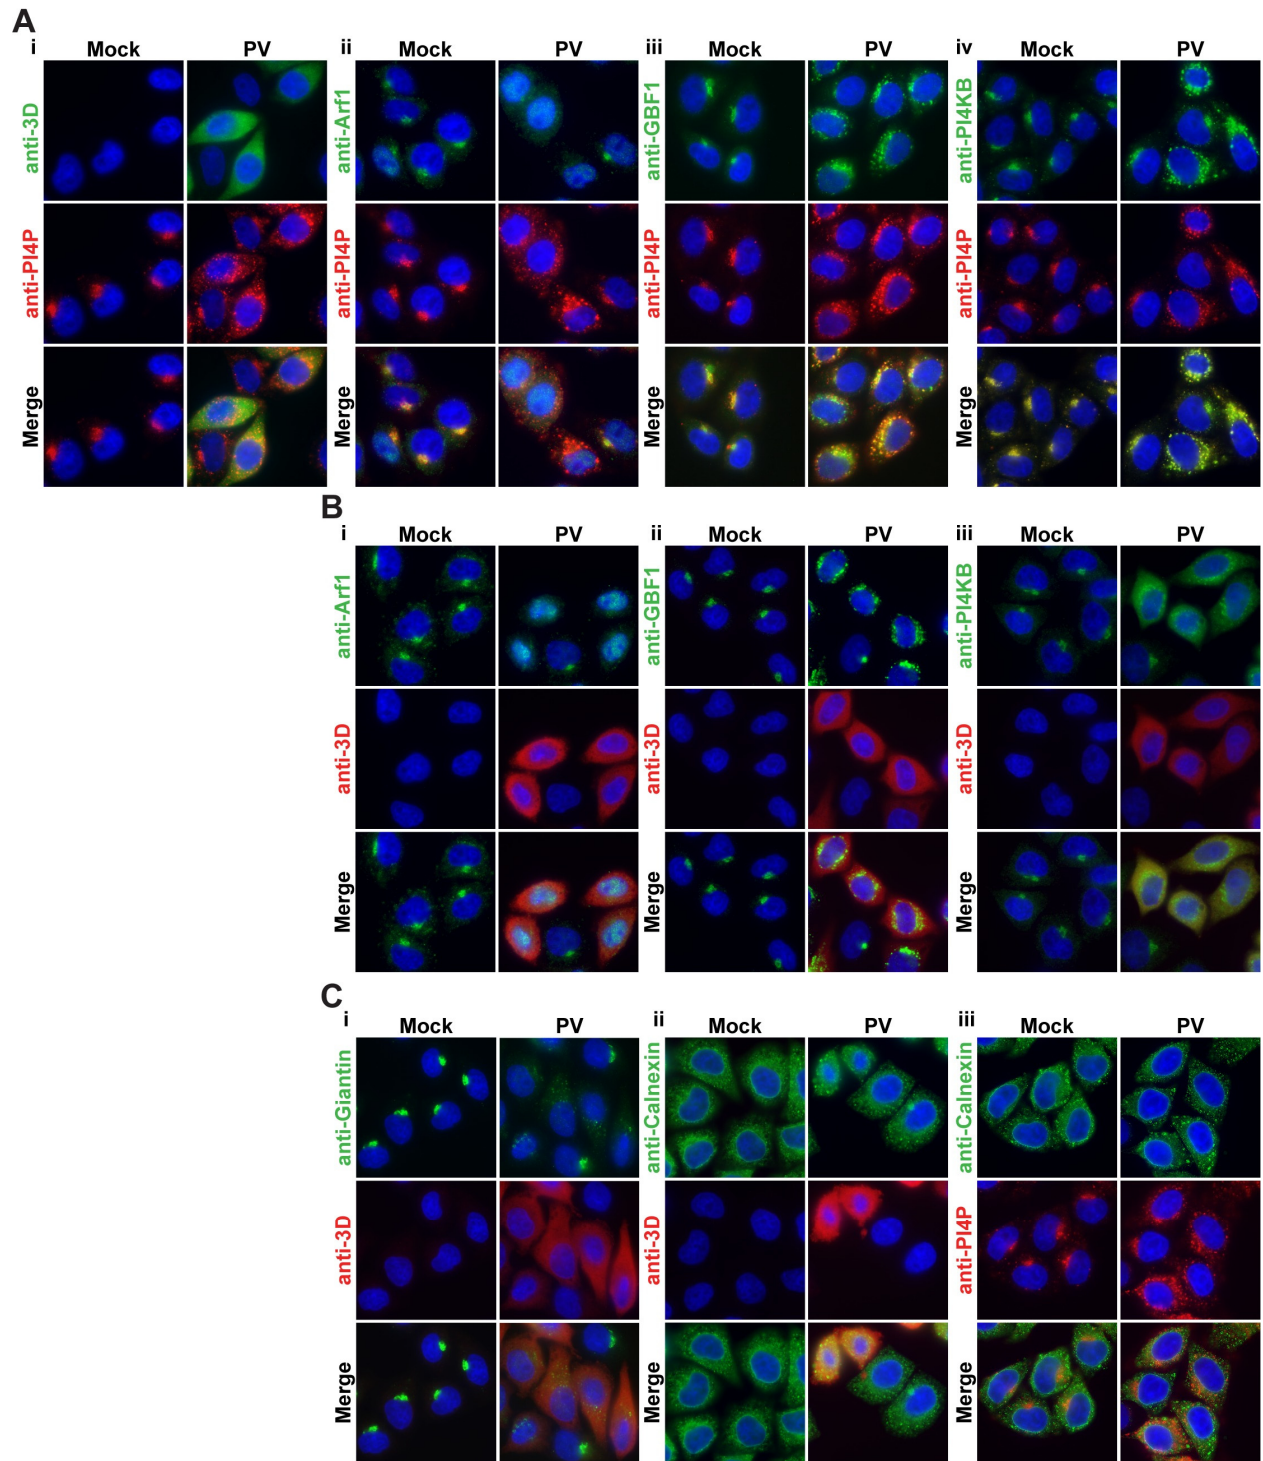

**S2 Fig. Changes to Arf1, GBF1, and PI4KB caused by 3CD are also observed during PV infection. (A)** HeLa cells were infected with PV at an MOI of 10. Four hours post-infection, cells were immunostained for the following: **(i)** 3D/3CD **(ii)** Arf1, **(iii)** GBF1, or **(iv)** PI4KB (green). Infected cells were identified by changes to pattern of

PI4P expression (red). The nucleus was stained with DAPI (blue). **(B)** Experiment performed as above immunostained for the following: **(i)** Arf1, **(ii)** GBF1, or **(iii)** PI4KB (green). Infected cells were identified by 3D/3CD expression (red). The nucleus was stained with DAPI (blue). **(C)** Experiment performed as above immunostained for the following: **(i)** Giantin or **(ii)** Calnexin (green). Infected cells were identified by 3D/3CD expression (red). The nucleus was stained with DAPI (blue).
