# Supplementary material for: Hijacking of multiple phospholipid biosynthetic pathways and induction of membrane biogenesis by a picornaviral 3CD protein
Source: PubMed Central journal article supplement (PMC5983871; doi:10.1371/journal.ppat.1007086), 2018-05-21
Supplement: ppat.1007086.s004.pdf [file ppat.1007086.s004.pdf]

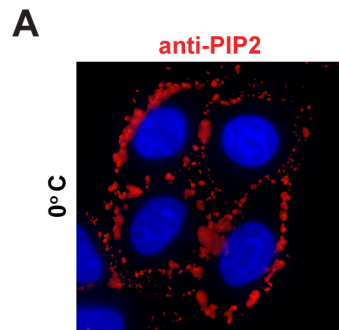

S4 Fig. **Specificity of the anti-PIP2 antibody.** PIP2 is located at the plasma membrane and can only be detected in naïve HeLa cells at 0 °C [51]. We confirm the activity and specificity of the antibody used in this study by immunostaining for PIP2 (red) at 0 °C. The nucleus was stained with DAPI (blue).
