# Supplementary material for: Hijacking of multiple phospholipid biosynthetic pathways and induction of membrane biogenesis by a picornaviral 3CD protein
Source: PubMed Central journal article supplement (PMC5983871; doi:10.1371/journal.ppat.1007086), 2018-05-21
Supplement: ppat.1007086.s006.pdf [file ppat.1007086.s006.pdf]

S1 Table. **Oligonucleotides used in this study.**

| <b>Primer</b> | <b>Sequence</b>                                                                          | <b>Description</b>                          |
|---------------|------------------------------------------------------------------------------------------|---------------------------------------------|
| 1             | 5'-TTC GGG AAT TCG CCA CCA TGG GAC CAC TCC<br>AGT ATA AAG AC-3'                          | Forward Primer to amplify<br>3AB            |
| 2             | 5'-CGT TAG CGG CCG CTT ACT ATT GTA CCT TTG<br>CTG TCC GAA TG-3'                          | Reverse Primer to amplify<br>3AB            |
| 3             | 5'-TTC GGG AAT TCG CCA CCA TGG GAC CAG GGT<br>TCG ATT AC-3'                              | Forward Primer to amplify<br>3CD            |
| 4             | 5'-CGT TAG CGG CCG CTT ACT AAA ATG AGT CAA<br>GCC AAC-3'                                 | Reverse Primer to amplify<br>3CD            |
| 5             | 5'-CGC AGT GGC TAT GGC TCT AAG AAA CAT TGT<br>TAC AGC-3'                                 | Forward primer to amplify<br>3C-K12L        |
| 6             | 5'-GCT GTA ACA ATG TTT CTT AGA GCC ATA GCC<br>ACT GCG-3'                                 | Reverse primer to amplify<br>3C-K12L        |
| 7             | 5'-CAG TGG CTA TGG CTA AAC TAA ACA TTG TTA<br>CAG CAA C-3'                               | Forward Primer to amplify<br>3C-R13L        |
| 8             | 5'-GTT GCT GTA ACA ATG TTT AGT TTA GCC ATA<br>GCC ACT G-3'                               | Reverse Primer to amplify<br>3C-R13L        |
| 9             | 5'-CTA AAG AGA AAT GAA AAG TTC CTA GAC ATT<br>AGA CCA CAT ATA CC-3'                      | Forward Primer to amplify<br>3C-R84L        |
| 10            | 5'-GGT ATA TGT GGT CTA ATG TCT AGG AAC TTT<br>TCA TTT CTC TTT AG-3'                      | Reverse Primer to amplify<br>3C-R84L        |
| 11            | 5'- GAA GGG TTG GAT AGT TAA CAT CAC CAG CCA<br>GGT TC-3'                                 | Forward primer for overlap<br>PCR           |
| 12            | 5'- TCG CTT CAG GGC CGC GGC AAA CCC GTG TGA<br>ACC G-3'                                  | Reverse primer for overlap<br>PCR           |
| 13            | 5'-ATT GGA AGA GCT TTA GAC CTC CCA GAG TAC<br>TCA ACA TTG TAC GAT CGT TGG CTT GAC TCA-3' | Forward Primer to amplify<br>3D-L446D-R455D |
| 14            | 5'-TGA GTC AAG CCA ACG ATC GTA CAA TGT TGA<br>GTA CTC TGG GAG GTC TAA AGC TCT TCC AAT-3' | Reverse Primer to amplify<br>3D-L446D-R455D |
| 15            | 5'-TTC GGG AAT TCG CCA CCA TGG GAC CAC TCC<br>AGT ATA AAG AC-3'                          | Forward Primer to amplify<br>3A             |
| 16            | 5'-CGT TAG CGG CCG CTT ACT ACT GGT GTC CAG<br>CAA ACA GTT TAT AC-3'                      | Reverse Primer to amplify<br>3A             |
