# Supplementary material for: Hijacking of multiple phospholipid biosynthetic pathways and induction of membrane biogenesis by a picornaviral 3CD protein
Source: PubMed Central journal article supplement (PMC5983871; doi:10.1371/journal.ppat.1007086), 2018-05-21
Supplement: ppat.1007086.s007.pdf [file ppat.1007086.s007.pdf]

S2 Table. **Statistical analysis of all experimental data.**

| <b>Fig No.</b> | <b>Samples</b>                                             | <b>Mean <math>\pm</math> SEM</b>            | <b>p-value</b> | <b>n</b> |
|----------------|------------------------------------------------------------|---------------------------------------------|----------------|----------|
| Fig 1          | Mock                                                       | 1.00 $\pm$ 0.02                             |                | 30       |
|                | 3AB                                                        | 0.81 $\pm$ 0.04                             |                | 27       |
|                | 3CD                                                        | 4.98 $\pm$ 0.43                             |                | 30       |
|                | 3A                                                         | 0.53 $\pm$ 0.03                             |                | 35       |
|                | Mock vs. 3AB                                               |                                             | <0.0001        |          |
|                | Mock vs. 3CD                                               |                                             | <0.0001        |          |
|                | Mock vs. 3A                                                |                                             | <0.0001        |          |
|                | 3AB vs. 3CD                                                |                                             | <0.0001        |          |
|                | 3AB vs. 3A                                                 |                                             | <0.0001        |          |
|                | 3CD vs. 3A                                                 |                                             | <0.0001        |          |
| Fig 2          | 3CD -PIK93                                                 | 1.84e <sup>8</sup> $\pm$ 1.19e <sup>7</sup> |                | 25       |
|                | 3CD +PIK93                                                 | 7.19e <sup>7</sup> $\pm$ 5.18e <sup>6</sup> |                | 25       |
|                | 3CD -PIK93 vs. WT+PIK93                                    |                                             | <0.0001        |          |
| Fig 3          | Mock                                                       | 0.43 $\pm$ 0.03                             |                | 3        |
|                | 3CD                                                        | 1.77 $\pm$ 0.03                             |                | 3        |
|                | Mock vs. 3CD                                               |                                             | <0.0001        |          |
| Fig 6 (B)      | Mock                                                       | 1.00 $\pm$ 0.04                             |                | 30       |
|                | 3CD <sup>m</sup>                                           | 1.06 $\pm$ 0.04                             |                | 30       |
|                | 3C <sup>m</sup> D                                          | 1.10 $\pm$ 0.04                             |                | 30       |
|                | 3CD <sup>m</sup> +3C <sup>m</sup> D                        | 3.08 $\pm$ 0.13                             |                | 30       |
|                | Mock vs. 3CD <sup>m</sup>                                  |                                             | 0.2602         |          |
|                | Mock vs. 3C <sup>m</sup> D                                 |                                             | 0.089          |          |
|                | Mock vs. 3CD <sup>m</sup> + 3C <sup>m</sup> D              |                                             | <0.0001        |          |
|                | 3CD <sup>m</sup> vs. 3C <sup>m</sup> D                     |                                             | 0.5574         |          |
|                | 3CD <sup>m</sup> vs. 3CD <sup>m</sup> + 3C <sup>m</sup> D  |                                             | < 0.0001       |          |
|                | 3C <sup>m</sup> D vs. 3CD <sup>m</sup> + 3C <sup>m</sup> D |                                             | < 0.0001       |          |
| Fig 6 (D)      | Mock                                                       | 0.42 $\pm$ 0.02                             |                | 3        |

|           |                                        |             |         |    |
|-----------|----------------------------------------|-------------|---------|----|
|           | 3CD <sup>m</sup>                       | 0.37 ± 0.07 |         | 3  |
|           | 3C <sup>m</sup> D                      | 1.27 ± 0.09 |         | 3  |
|           | Mock vs. 3CD <sup>m</sup>              |             | 0.4498  |    |
|           | Mock vs. 3C <sup>m</sup> D             |             | 0.0007  |    |
|           | 3CD <sup>m</sup> vs. 3C <sup>m</sup> D |             | 0.0012  |    |
| Fig 7 (B) | Mock                                   | 1.00 ± 0.03 |         | 42 |
|           | 3CD                                    | 2.60 ± 0.13 |         | 30 |
|           | 3CD+3AB                                | 2.47 ± 0.10 |         | 30 |
|           | 3CD+3A                                 | 0.83 ± 0.03 |         | 35 |
|           | Mock vs 3CD                            |             | <0.0001 |    |
|           | Mock vs 3CD+3AB                        |             | <0.0001 |    |
|           | Mock vs 3CD+3A                         |             | <0.0001 |    |
|           | 3CD vs 3CD+3AB                         |             | 0.1490  |    |
|           | 3CD vs 3CD+3A                          |             | <0.0001 |    |
|           | 3CD+3AB vs 3CD+3A                      |             | <0.0001 |    |
| Fig 8 (B) | 3CD                                    | 170 ± 10    |         | 3  |
|           | 3CD <sup>m</sup>                       | 330 ± 30    |         | 3  |
|           | 3C <sup>m</sup> D                      | 80 ± 10     |         | 3  |
|           | 3CD vs 3CD <sup>m</sup>                |             | 0.0072  |    |
|           | 3CD vs 3C <sup>m</sup> D               |             | 0.0031  |    |
|           | 3CD <sup>m</sup> vs 3C <sup>m</sup> D  |             | 0.0014  |    |
| Fig 9 (A) | Mock                                   | 1.00 ± 0.05 |         | 30 |
|           | Infection                              | 6.62 ± 0.37 |         | 30 |
|           | Mock vs. Infection                     |             | <0.0001 |    |
| Fig 9 (B) | Mock                                   | 1.00 ± 0.04 |         | 30 |
|           | Infection                              | 3.03 ± 0.15 |         | 30 |
|           | Mock vs. Infection                     |             | <0.0001 |    |
| Fig 9 (C) | Mock                                   | 1.00 ± 0.07 |         | 30 |
|           | 3CD                                    | 4.37 ± 0.25 |         | 30 |

|            |                                               |             |         |    |
|------------|-----------------------------------------------|-------------|---------|----|
|            | 3CD <sup>m</sup>                              | 3.21 ± 0.16 |         | 30 |
|            | 3C <sup>m</sup> D                             | 3.82 ± 0.25 |         | 30 |
|            | Mock vs. 3CD                                  |             | <0.0001 |    |
|            | Mock vs. 3CD <sup>m</sup>                     |             | <0.0001 |    |
|            | Mock vs. 3C <sup>m</sup> D                    |             | <0.0001 |    |
|            | 3CD vs. 3CD <sup>m</sup>                      |             | 0.0002  |    |
|            | 3CD vs. 3C <sup>m</sup> D                     |             | 0.1264  |    |
|            | 3CD <sup>m</sup> vs. 3C <sup>m</sup> D        |             | 0.0447  |    |
| Fig 9 (D)  | Mock                                          | 1.00 ± 0.02 |         | 45 |
|            | 3CD                                           | 2.18 ± 0.07 |         | 45 |
|            | 3CD <sup>m</sup>                              | 1.89 ± 0.07 |         | 45 |
|            | 3C <sup>m</sup> D                             | 2.06 ± 0.10 |         | 28 |
|            | Mock vs. 3CD                                  |             | <0.0001 |    |
|            | Mock vs. 3CD <sup>m</sup>                     |             | <0.0001 |    |
|            | Mock vs. 3C <sup>m</sup> D                    |             | <0.0001 |    |
|            | 3CD vs. 3CD <sup>m</sup>                      |             | 0.0041  |    |
|            | 3CD vs. 3C <sup>m</sup> D                     |             | 0.3129  |    |
|            | 3CD <sup>m</sup> vs. 3C <sup>m</sup> D        |             | 0.1583  |    |
| S1 Fig     | Mock                                          | 1.28 ± 0.14 |         | 4  |
|            | Infection                                     | 8.38 ± 0.81 |         | 4  |
|            | Mock vs. Infection                            |             | 0.0001  |    |
| S3 (B) Fig | Mock                                          | 1.06 ± 0.02 |         | 20 |
|            | 3C <sup>R13L</sup> D                          | 1.10 ± 0.06 |         | 20 |
|            | 3C <sup>R84L</sup> D                          | 0.96 ± 0.05 |         | 20 |
|            | Mock vs. 3C <sup>R13L</sup> D                 |             | 0.5386  |    |
|            | Mock vs. 3C <sup>R84L</sup> D                 |             | 0.0756  |    |
|            | 3C <sup>R13L</sup> D vs. 3C <sup>R84L</sup> D |             | 0.0798  |    |
| S3 (D) Fig | Mock                                          | 0.43 ± 0.03 |         | 3  |
|            | 3C <sup>R13L</sup> D                          | 1.23 ± 0.18 |         | 3  |

|            |                                               |             |         |    |
|------------|-----------------------------------------------|-------------|---------|----|
|            | 3C <sup>R84L</sup> D                          | 1.50 ± 0.15 |         | 3  |
|            | Mock vs. 3C <sup>R13L</sup> D                 |             | 0.0112  |    |
|            | Mock vs. 3C <sup>R84L</sup> D                 |             | 0.0024  |    |
|            | 3C <sup>R13L</sup> D vs. 3C <sup>R84L</sup> D |             | 0.3169  |    |
| S5 (C) Fig | Mock                                          | 1.03 ± 0.07 |         | 30 |
|            | 3CD                                           | 4.71 ± 0.27 |         | 30 |
|            | 3C <sup>R13L</sup> D                          | 4.08 ± 0.27 |         | 30 |
|            | 3C <sup>R84L</sup> D                          | 3.71 ± 0.31 |         | 30 |
|            | Mock vs. 3CD                                  |             | <0.0001 |    |
|            | Mock vs. 3C <sup>R13L</sup> D                 |             | <0.0001 |    |
|            | Mock vs. 3C <sup>R84L</sup> D                 |             | <0.0001 |    |
|            | 3CD vs. 3C <sup>R13L</sup> D                  |             | 0.1053  |    |
|            | 3CD vs. 3C <sup>R84L</sup> D                  |             | 0.0194  |    |
|            | 3C <sup>R13L</sup> D vs. 3C <sup>R84L</sup> D |             | 0.3827  |    |
| S5 (D) Fig | Mock                                          | 1.00 ± 0.04 |         | 20 |
|            | 3CD                                           | 2.39 ± 0.15 |         | 20 |
|            | 3C <sup>R13L</sup> D                          | 2.52 ± 0.14 |         | 20 |
|            | 3C <sup>R84L</sup> D                          | 2.02 ± 0.11 |         | 20 |
|            | Mock vs. 3CD                                  |             | <0.0001 |    |
|            | Mock vs. 3C <sup>R13L</sup> D                 |             | <0.0001 |    |
|            | Mock vs. 3C <sup>R84L</sup> D                 |             | <0.0001 |    |
|            | 3CD vs. 3C <sup>R13L</sup> D                  |             | 0.5371  |    |
|            | 3CD vs. 3C <sup>R84L</sup> D                  |             | 0.0523  |    |
|            | 3C <sup>R13L</sup> D vs. 3C <sup>R84L</sup> D |             | 0.0078  |    |
